# Supplementary material
Source: Research Square preprint supplement (doi:10.21203/rs.3.rs-9361150/v1)
Supplement: Supplementary file 1 [file 406aa1805888a55743ee69ec.docx]

**SUPPLEMENTAL STATISTICAL NOTE**

**Variable selection and model retention threshold**

Candidate predictors for each multivariable model were first screened using a variance-preserving, AIC-based feature selection algorithm [S1] to reduce multicollinearity prior to Firth logistic regression. Selected variables were retained in final models at a prespecified two-tailed threshold of p<0.15. This threshold was chosen to balance parsimony with model discrimination, consistent with purposeful selection strategies in which the goal is predictive performance rather than hypothesis testing of individual coefficients [S2]. A stricter threshold of p<0.05 was evaluated in sensitivity analyses and did not materially alter the direction or magnitude of primary associations.

**Firth penalised likelihood**

Firth's penalised likelihood method was used for all primary outcome models because of low event counts in several outcome categories (deferred surgery, n=28; open reduction, n=20; intraoperative complications, n=1) [S3]. Standard maximum likelihood logistic regression produces biased and potentially infinite estimates under these conditions. Firth's method reduces this bias through a penalisation of the likelihood function and was applied uniformly across models for consistency rather than selectively based on observed separation.

**Inpatient admission model: open reduction as covariate**

Surgical approach (open vs closed reduction) was included as a covariate in the inpatient admission model despite being determined intraoperatively rather than at presentation. This decision was made to evaluate whether the association between fracture severity and admission persisted after accounting for the additional operative complexity associated with open reduction — that is, to isolate the independent contribution of severity to admission beyond its effect on surgical approach. The association between high-severity fracture and admission remained strong and statistically significant after this adjustment (aOR 5.29, 95% CI 2.80–9.99), supporting the interpretation that severity influences admission through mechanisms beyond operative complexity alone.

**Gartland dichotomisation**

Gartland classification was dichotomised as low severity (types I–II) versus high severity (types III and above) for primary analyses. This decision was driven by clinical convention, the distribution of the cohort (type III fractures comprised 95.6% of the high-severity group), and the low counts in boundary categories (n=1 type I, n=7 type IV) that precluded reliable estimation of category-specific effects. Ordered or continuous severity parameterisations were not pursued given these constraints.

**Model discrimination and cross-validation**

AUC estimates were cross-validated using leave-one-out (jackknife) predicted probabilities rather than apparent (in-sample) estimates to reduce optimism bias. For small samples with low event counts, leave-one-out cross-validation provides a less biased discrimination estimate than bootstrap or split-sample approaches, which are sensitive to random partitioning under these conditions [S2].

**Missing data**

Three observations were excluded from multivariable analyses due to missing covariate data (complete-case analysis, n=239). The small number of missing observations and the absence of a clear pattern of missingness did not warrant multiple imputation; a complete-case sensitivity analysis was considered adequate given the minimal exclusion rate (1.2%).

**Supplemental references**

[S1] Zhao Z, et al. Massively parallel feature selection: an approach based on variance preservation. *Mach Learn.* 2013;92:195–220.

[S2] Hosmer DW, Lemeshow S, Sturdivant RX. *Applied Logistic Regression.* 3rd ed. Wiley; 2013.

[S3] Firth D. Bias reduction of maximum likelihood estimates. *Biometrika.* 1993;80:27–38.
